# Supplementary material
Source: PubMed Central journal article supplement (PMC5906196)
Supplement: NIHMS949433-supplement-supplement_1.pdf [file NIHMS949433-supplement-supplement_1.pdf]

## SUPPLEMENTAL TABLES

TABLE S1: Patient Disposition and Time Period on SO Before Discontinuation

| SO follow-up time (months) | Patients continuing SO therapy | Patients who ended SO follow-up | Reason for end of SO follow-up                |                                                      |                                             |                                             |
|----------------------------|--------------------------------|---------------------------------|-----------------------------------------------|------------------------------------------------------|---------------------------------------------|---------------------------------------------|
|                            |                                |                                 | <i>FKC discharge / switch to HD treatment</i> | <i>Prescription of new PB added on to SO therapy</i> | <i>Prescription of new PB to replace SO</i> | <i>No further PB prescriptions recorded</i> |
| 4                          | 205                            | 53                              | 5                                             | 5                                                    | 5                                           | 38                                          |
| 5                          | 166                            | 39                              | 1                                             | 3                                                    | 8                                           | 27                                          |
| 6                          | 107                            | 59                              | 5                                             | 0                                                    | 4                                           | 50                                          |
| End of 6 months (total N)  | 107                            | 151                             | 11                                            | 8                                                    | 17                                          | 115                                         |

Values are expressed as number of patients

Abbreviations: FKC – Fresenius Kidney Care; PB – phosphate binder; SO – sucroferric oxyhydroxide

**TABLE S2: Phosphate Binder Use among Patients with In-Range Serum Phosphorus Levels at Baseline**

| Baseline month | Patients with sP recorded | n/N (%) sP ≤ 5.5 mg/dL | Baseline binder for sP ≤ 5.5 patients (FreseniusRx & FKC EHR database) |               |                     |                  |                |
|----------------|---------------------------|------------------------|------------------------------------------------------------------------|---------------|---------------------|------------------|----------------|
|                |                           |                        | Calcium acetate                                                        | Sevelamer     | Lanthanum carbonate | > 1 PB recorded* | No PB recorded |
| -3             | 226                       | 68/226 (30.1%)         | 16/68 (23.5%)                                                          | 22/68 (32.3%) | 0                   | 7/68 (10.3%)     | 23/68 (33.8%)  |
| -2             | 232                       | 59/232 (25.4%)         | 16/59 (27.1%)                                                          | 20/59 (33.9%) | 0                   | 6/59 (10.2%)     | 17/59 (45.8%)  |
| -1             | 248                       | 64/248 (25.8%)         | 17/64 (26.6%)                                                          | 20/64 (31.3%) | 2/64 (3.1%)         | 6/64 (9.4%)      | 19/64 (29.7%)  |

Baseline month is calculated relative to SO treatment initiation

Values are expressed as n/N (%) of patients

Abbreviations: FKC EHR – Fresenius Kidney Care electronic health records; PB – phosphate binder; sP – serum phosphorus

\* >1 PB refers to a combination of sevelamer, calcium acetate, and/or lanthanum carbonate



**TABLE S4: Oral Calcimimetics and Active Vitamin D Use among Patients with In-Range Serum Phosphorus for  $\geq 1$  Quarter of SO Follow-up**

| Parameter                                                                                       | Baseline    | SO follow-up | P-value |
|-------------------------------------------------------------------------------------------------|-------------|--------------|---------|
| Patients with serum phosphorus $\leq 5.5$ mg/dL for $\geq 3$ months of SO follow-up ( $n=110$ ) |             |              |         |
| Patients treated with oral cinacalcet, n(%)                                                     | 33 (30%)    | 39 (35.50%)  | 0.058   |
| Oral cinacalcet dose (mg/day)                                                                   | 48.6 (4.8)  | 46 (4.4)     | 0.4     |
| Patients treated with oral active vitamin D, n(%)*                                              | 64 (58.20%) | 68 (61.80%)  | 0.16    |
| Oral calcitriol dose (mcg/day)                                                                  | 0.46 (0.04) | 0.45 (0.04)  | 0.6     |
| Subset of patients with serum phosphorus $> 5.5$ mg/dL at baseline ( $n=63$ )                   |             |              |         |
| Patients treated with oral cinacalcet, n(%)                                                     | 21 (33.3%)  | 23 (36.5%)   | 0.4     |
| Oral cinacalcet dose (mg/day)                                                                   | 54 (5.3)    | 41.6 (4.7)   | 0.015   |
| Patients treated with oral active vitamin D, n(%)*                                              | 37 (58.70%) | 31 (61.90%)  | 0.16    |
| Oral calcitriol dose (mcg/day)                                                                  | 0.48 (0.07) | 0.51 (0.07)  | 0.3     |

Values are expressed as least-squared mean (standard error), or n(%) of patients. p-values compare summary estimates between treatment periods.

Abbreviations: SO – sucroferric oxyhydroxide

\* Oral active vitamin D includes calcitriol, doxercalciferol, and alfacalidol
